# Supplementary material for: Supplementation-Dependent Effects of Vegetable Oils with Varying Fatty Acid Compositions on Anthropometric and Biochemical Parameters in Obese Women
Source: PubMed Central journal article supplement (PMC6073593; doi:10.3390/nu10070932), 2018-07-20
Supplement: nutrients-10-00932-s001.pdf [file nutrients-10-00932-s001.pdf]

Supplementary file 1

Table 1 - Centesimal composition of the Oils used in this study.

| FATTY ACIDS          | Composition (%)          |                            |                       |                          |
|----------------------|--------------------------|----------------------------|-----------------------|--------------------------|
|                      | Coconut oil <sup>a</sup> | Safflower oil <sup>b</sup> | Chia oil <sup>c</sup> | Soybean oil <sup>d</sup> |
| Oléic (C18:1)        | 4,73                     | 13,34                      | 9,83                  | 24,33                    |
| Linoleic (C18:2)     | 2,15                     | 81,15                      | 9,98                  | 48,32                    |
| Linolenic (C18:3)    | ---                      | 0,7                        | 66,57                 | 7,16                     |
| Palmitic (C16:0)     | 8,65                     | 2,48                       | 8,56                  | 14,1                     |
| Estearic (C18:0)     | 2,05                     | 2,33                       | 2,88                  | 4,78                     |
| Miristic (C14:0)     | 17,27                    | ----                       | 1,34                  | 1,11                     |
| Caprylic acid (C8:0) | 5,3                      | ----                       | --                    | --                       |
| Capric (C10:0)       | 4,72                     | ----                       | --                    | --                       |
| Lauric (C12:0)       | 55,13                    | ----                       | --                    | --                       |
| Eicosanoic (C20:0)   | ----                     | ----                       | 0,84                  | 0,19                     |
| TOTAL                | 100%                     | 100%                       | 100%                  | 100%                     |

Source: Food Analysis Laboratory - Federal University of Pernambuco. Chromatography Laboratory - Department of Chemical Engineering - Federal University of Pernambuco. <sup>a</sup>Cocos nucifera L. <sup>b</sup> Carthamus tinctorius. <sup>c</sup>Salvia Hispanica <sup>d</sup>Óleo de soja

Table 2 - Description of anthropometric and biochemical evaluations.

| <b>Anthropometric and biochemical assessments used in the study</b> |                                                                                                                                                                |
|---------------------------------------------------------------------|----------------------------------------------------------------------------------------------------------------------------------------------------------------|
| Weight (Kg)                                                         | The participant was placed in the center of the base of a calibrated platform weighing 150 kg and divided into 100 g (WHO, 2008) <sup>1</sup> .                |
| Height (cm)                                                         | The participant stood barefoot, her heels together, her back straight, her arms extended along her body. The height was measured through a 2 meter stadiometer |

|                                                    |                                 |                                                                                                                    |
|----------------------------------------------------|---------------------------------|--------------------------------------------------------------------------------------------------------------------|
|                                                    |                                 | divided in centimeters (Lohman et al 1988) <sup>2</sup> .                                                          |
|                                                    |                                 | It was calculated from the formula: Current weight in kg / (Height in m) <sup>2</sup> (Garrow                      |
| Body mass index(Kg/m <sup>2</sup> )                | & Webster, 1985) <sup>3</sup> . |                                                                                                                    |
|                                                    |                                 | It was measured with the volunteer standing with a tape measure at the midpoint                                    |
| Waist circumference (cm)                           |                                 | between the iliac crest and the last rib (WHO, 2008)                                                               |
|                                                    |                                 | It was calculated from the formula: WC in cm / Height in cm. (Haum et al.,                                         |
| Waist Height Ratio                                 |                                 | 2009).                                                                                                             |
|                                                    |                                 |                                                                                                                    |
| Conicity index                                     |                                 | It was calculated from formula (Valdez, 1991)                                                                      |
|                                                    |                                 | conicity index = $\frac{\text{waist circumference (m)}}{0.109 \sqrt{\text{weight (kg)} \times \text{stature (m)}}$ |
| Total Cholesterol (TC)                             |                                 | Automated enzymatic method                                                                                         |
|                                                    |                                 |                                                                                                                    |
| Low-density lipoprotein cholesterol                |                                 | Automated enzymatic method                                                                                         |
|                                                    |                                 |                                                                                                                    |
| <b>High-density lipoprotein cholesterol (HDLc)</b> |                                 | Automated enzymatic method                                                                                         |
|                                                    |                                 |                                                                                                                    |
| Triglycerides                                      |                                 | Automated enzymatic method                                                                                         |
|                                                    |                                 |                                                                                                                    |
| Hemoglobina glicosilada (HbA1c)                    |                                 | High performance liquid chromatography (HPLC).                                                                     |
|                                                    |                                 |                                                                                                                    |
| Estimated Mean Glycemia                            |                                 | GME = 28,7 × Hb A1c – 46,7 (Nathan et al, 2008)                                                                    |

---
